# Supplementary material
Source: MDPI journal article supplement (https://www.mdpi.com/2073-4352/11/7/785)
Supplement: s1 [file s1 › crystals-1256228-SI.pdf]

## Supplementary Information

### Synthesis and characterization of novel bio-chiral dopants derived from bio-betulin obtained from fermentation process

*Veridiana G. Guimarães<sup>1</sup>, Anastasia Svanidze<sup>1</sup>, Tianyi Guo<sup>1</sup>, Pawan Nepal<sup>2</sup>, Robert Twieg<sup>2</sup>, Peter Palffy-Muhoray<sup>1</sup> and Hiroshi Yokoyama<sup>1</sup>*

*<sup>1</sup>Advanced Materials and Liquid Crystal Institute  
Kent State University, Kent, OH 44242, USA.*

*<sup>2</sup>Department of Chemistry and Biochemistry  
Kent State University, Kent, OH 44242, USA.*

## Contents

|                                                                                   |       |
|-----------------------------------------------------------------------------------|-------|
| Bio-CD29 NMR and IR Spectra (fermentation derived)                                | 2-3   |
| CD29 NMR and IR Spectra (commercial derived)                                      | 4-5   |
| Spectral comparisons of fermentation derived and commercial betulin derived CD-29 | 6-7   |
| Bio-CD46 NMR and IR Spectra (fermentation derived)                                | 8-9   |
| CD46 NMR and IR Spectra (commercial derived)                                      | 10-11 |
| Spectral comparisons of fermentation derived and commercial betulin derived CD-46 | 12-13 |
| HPLC Analysis of starting betulins and CD29 and CD46 products                     | 14-24 |
| Melting points for CD29 and CD46 (fermentation and commercial derived)            | 25    |

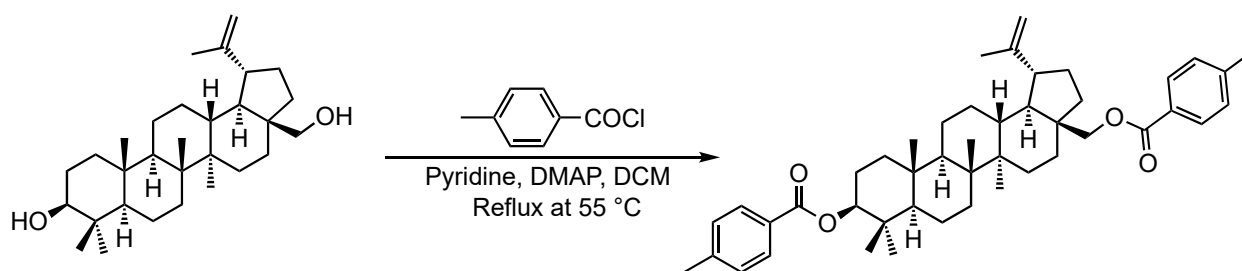

**Preparative Route for Bio-CD29 (using fermentation derived betulin)**

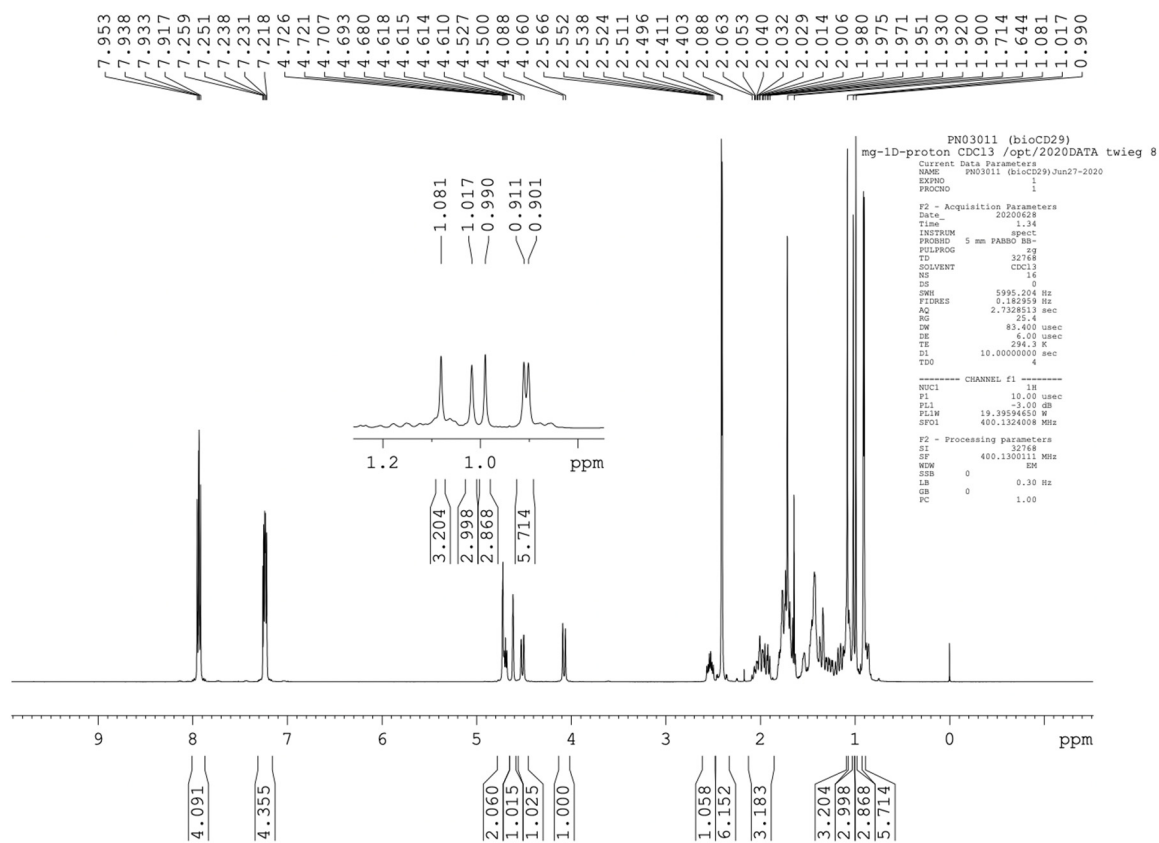

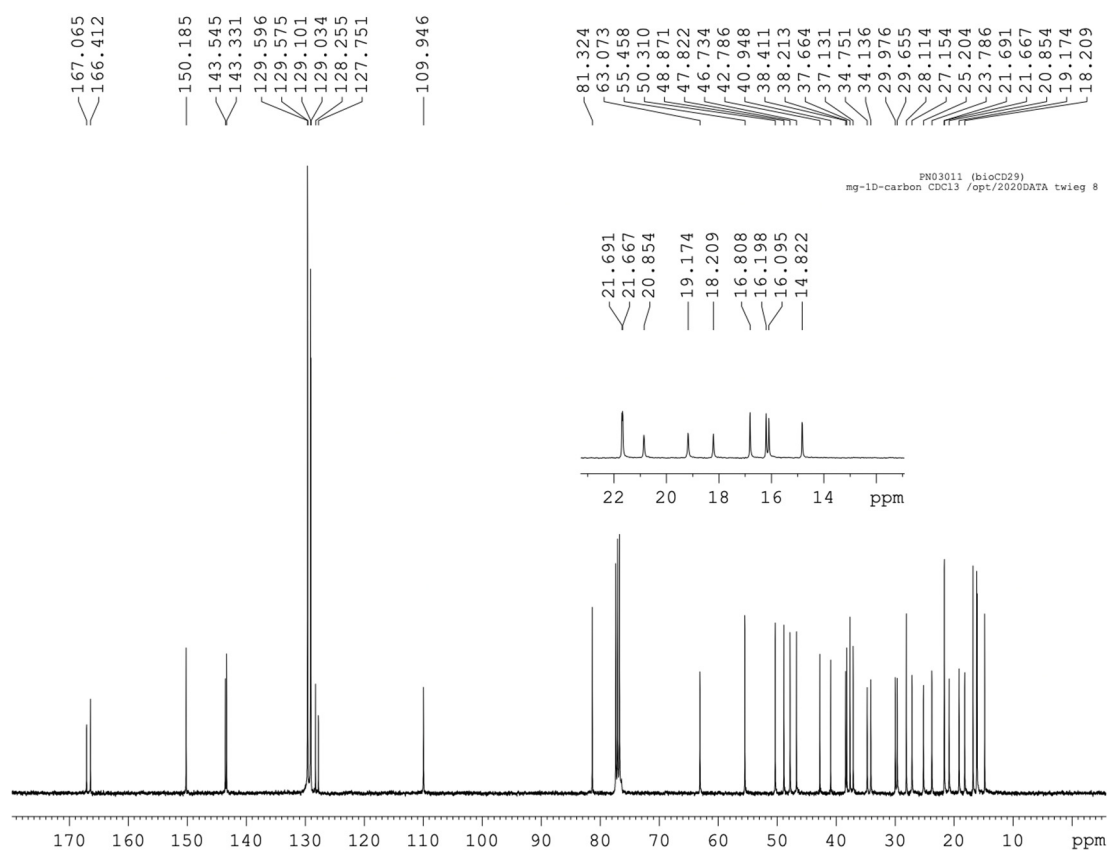

**<sup>13</sup>C NMR of Bio-CD29 (prepared from fermentation derived betulin)**

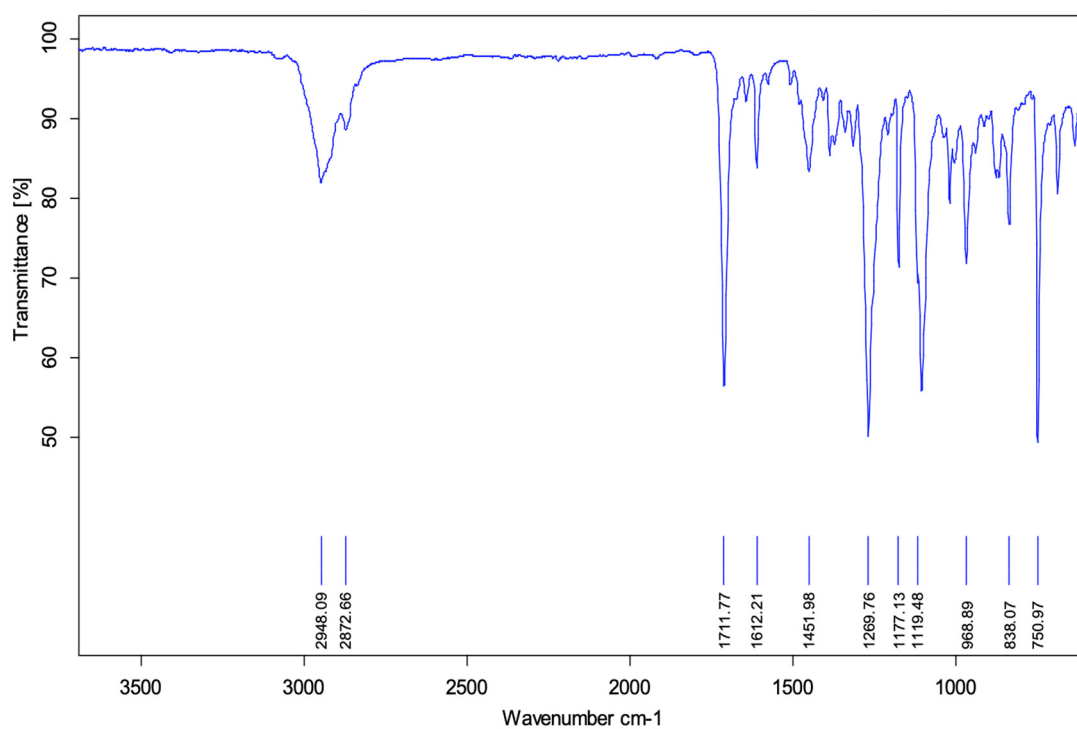

**IR Spectrum of Bio-CD29 (prepared from fermentation derived betulin)**

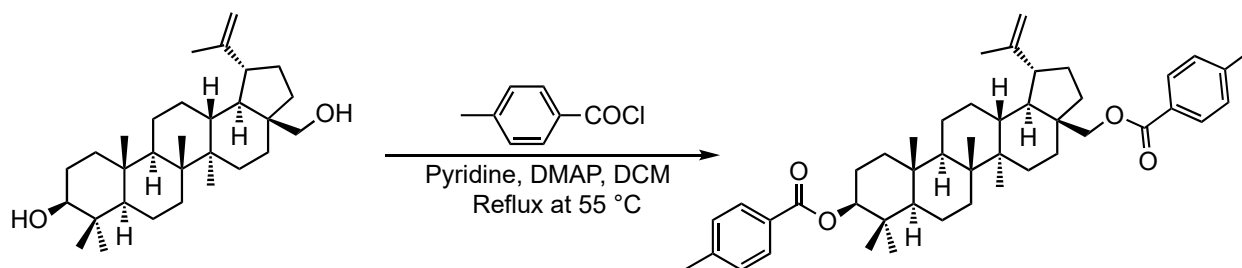

### Preparative Route for CD29 (using commercial betulin)

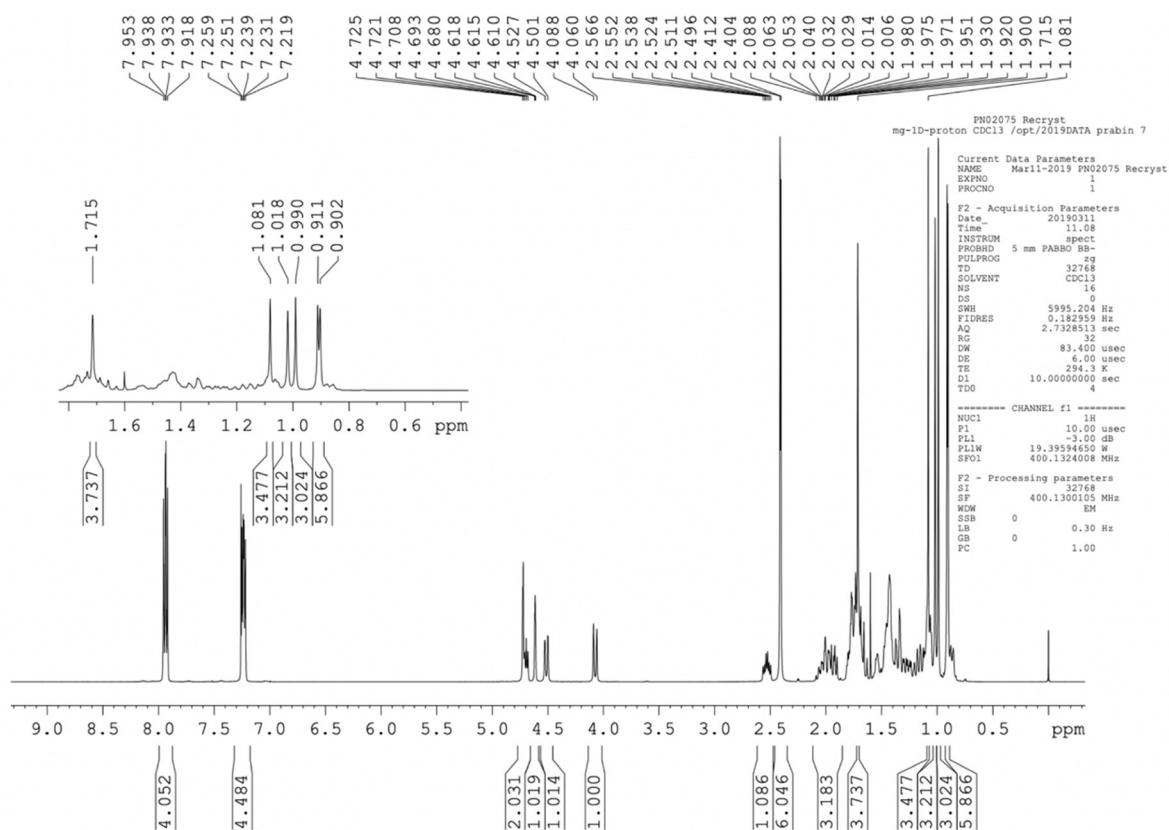

<sup>1</sup>H NMR of CD29 (prepared from commercial betulin)

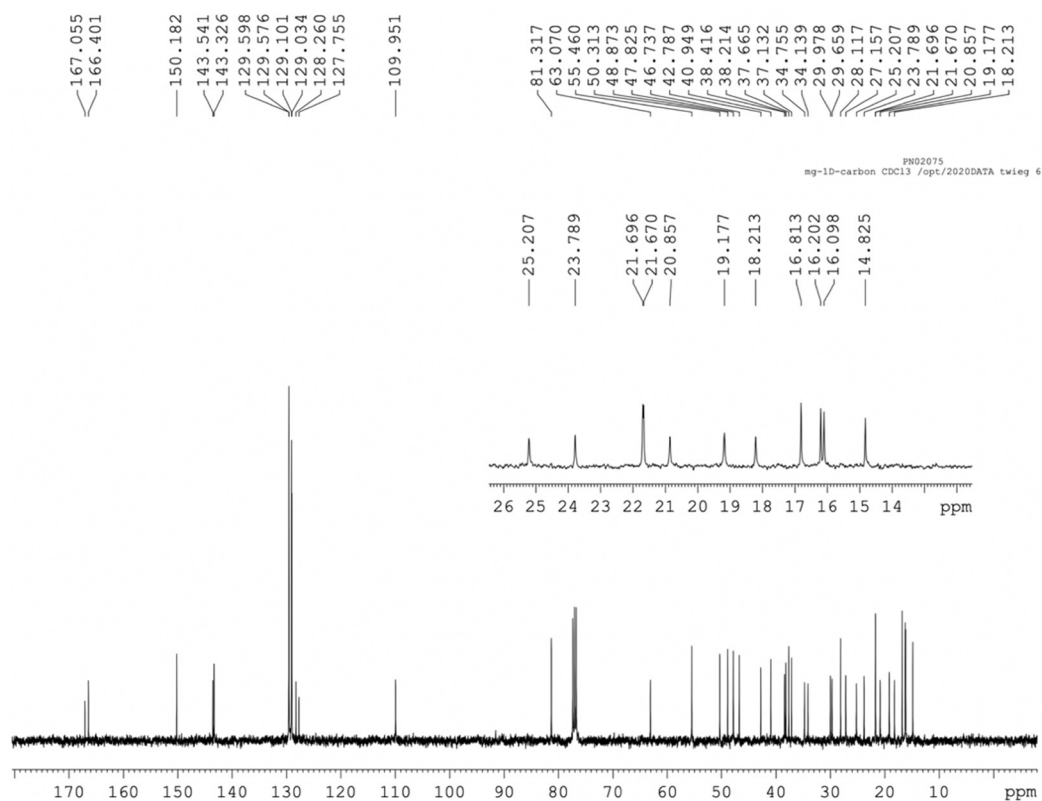

**$^{13}\text{C}$ NMR of CD29 (prepared from commercial betulin)**

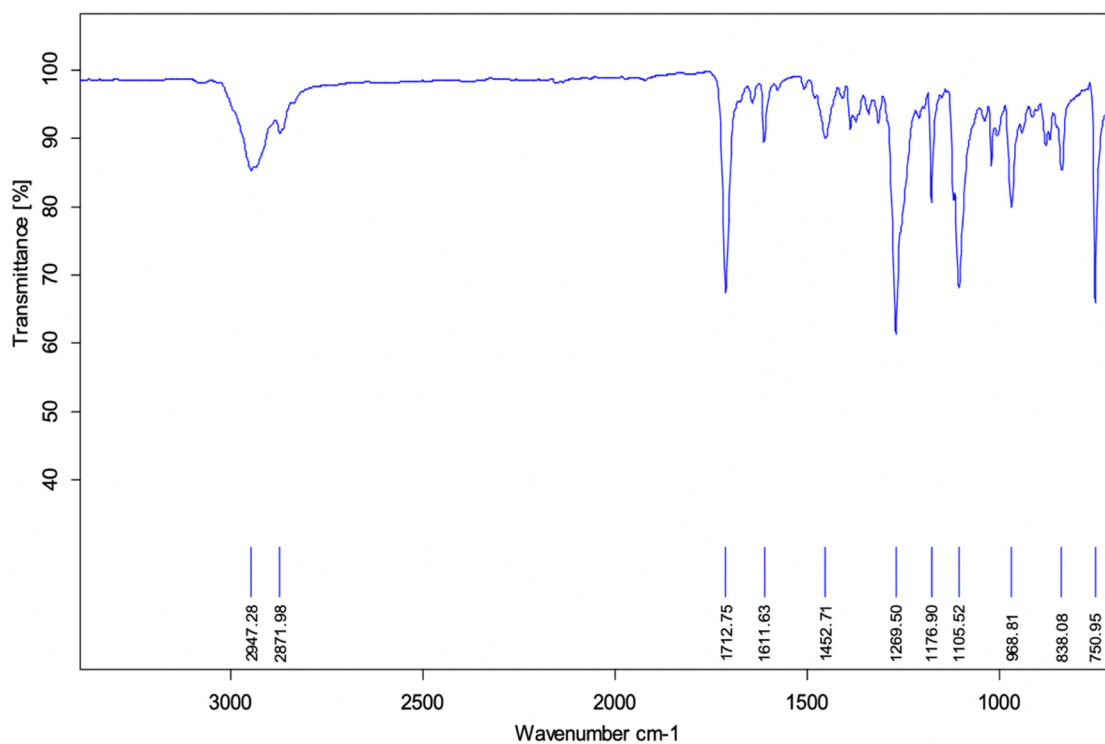

**IR Spectrum of CD29 (prepared from commercial betulin)**

## Spectral comparisons of bio-betulin and commercial betulin derived CD-29:

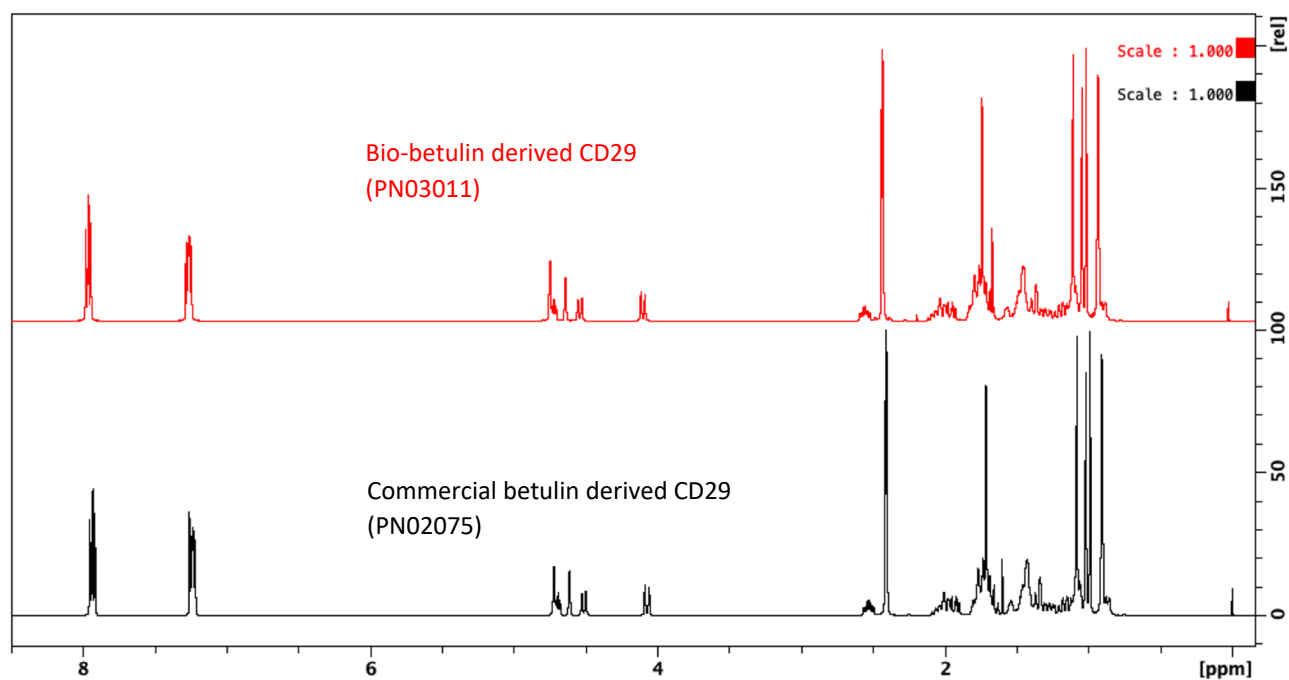

$^1\text{H}$ NMR comparison of CD-29 obtained from fermentation derived and commercial betulin.

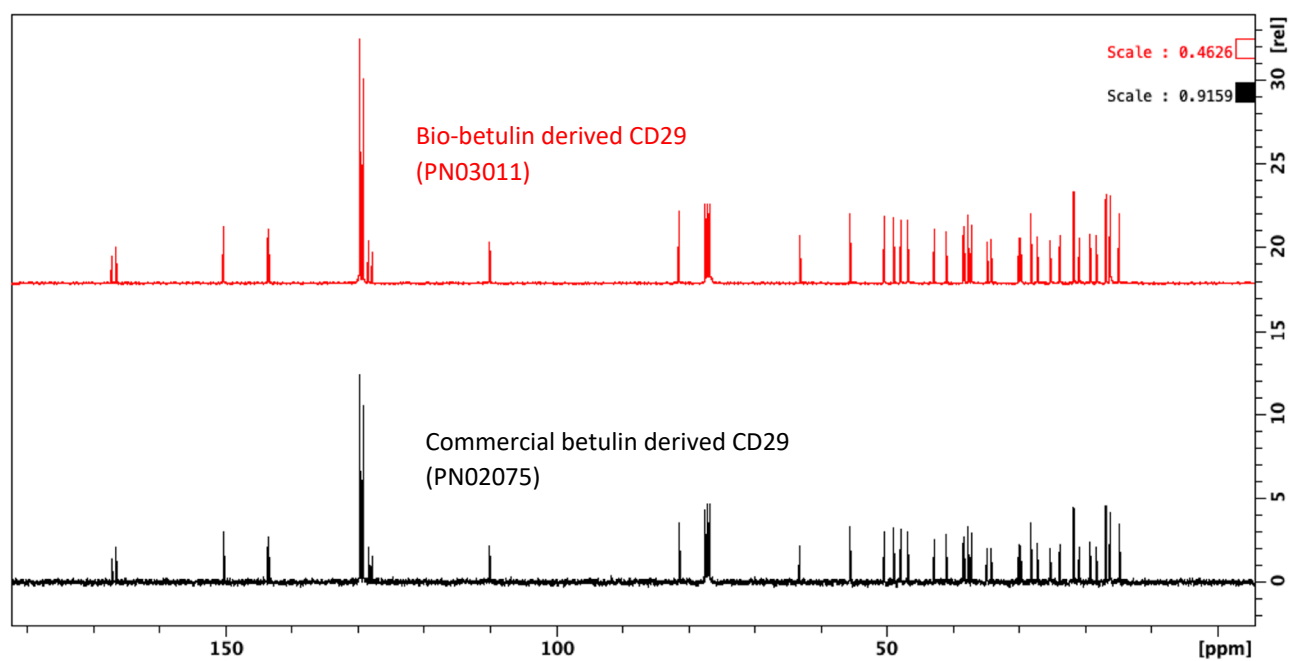

$^{13}\text{C}$ NMR comparison of CD-29 obtained from fermentation derived and commercial betulin.

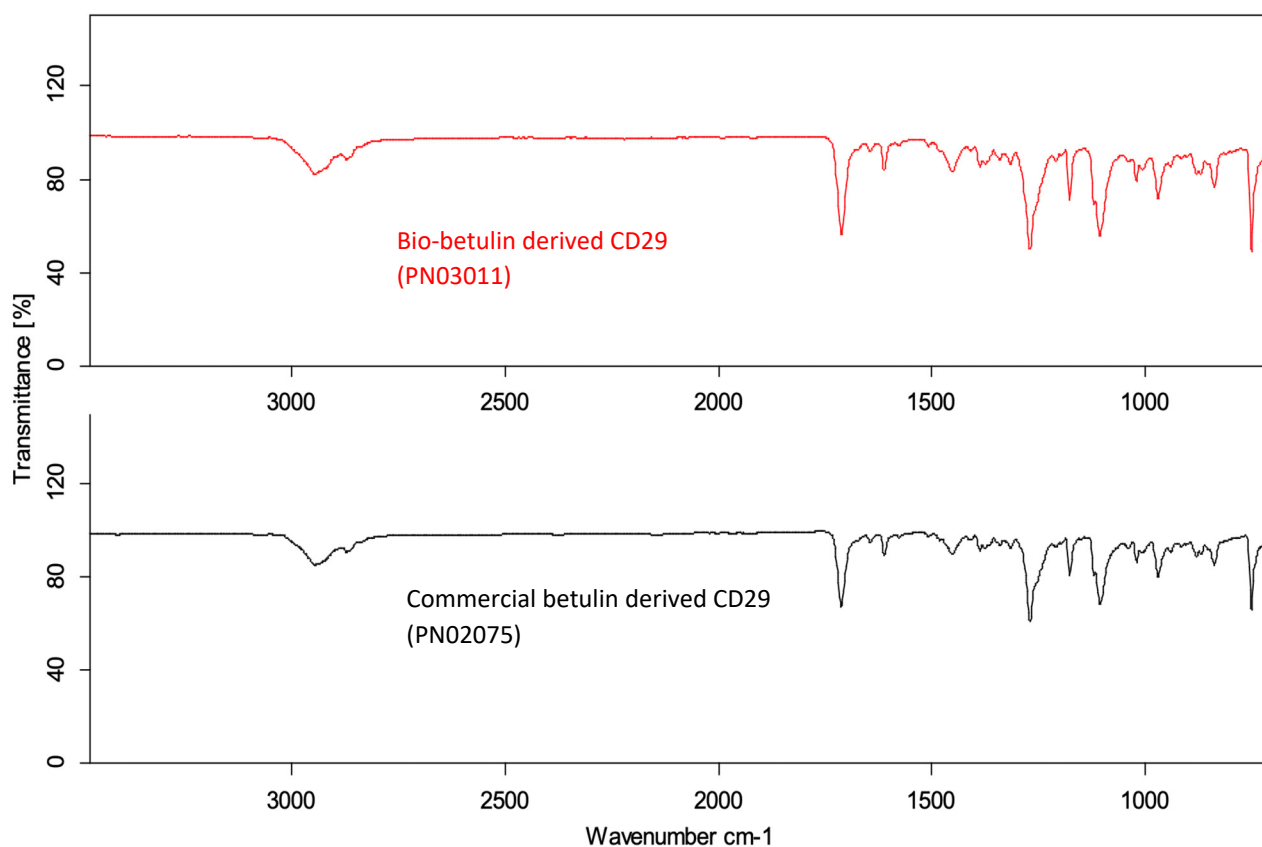

**IR comparison of CD-29 obtained from fermentation derived and commercial betulin.**

**Comment:**

The <sup>1</sup>H NMRs of **CD29** prepared from commercial betulin and fermentation derived betulin are identical. Likewise, the respective <sup>13</sup>C NMRs and infrared spectra are identical.

This is all evidence that the **CD29** prepared from the two betulin sources are identical.

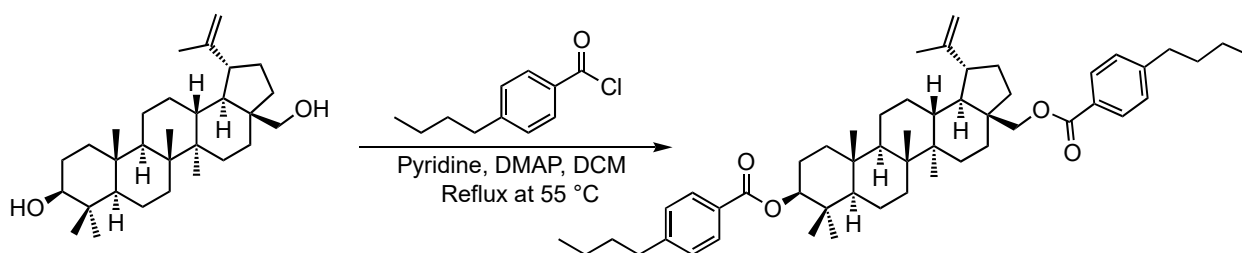

**Preparative Route for Bio-CD46 (using fermentation derived betulin supplied by Zymergen)**

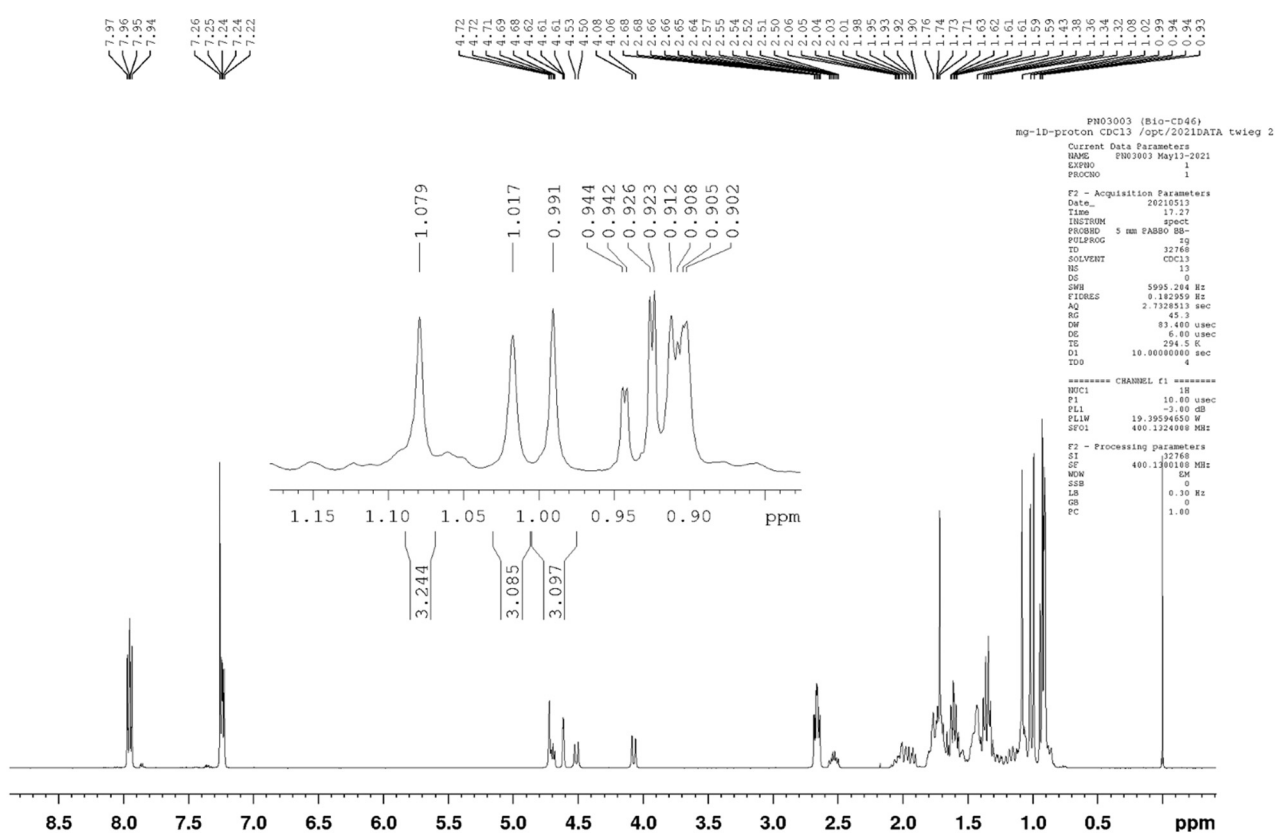

**<sup>1</sup>H NMR of Bio-CD46 (using fermentation derived betulin supplied by Zymergen)**

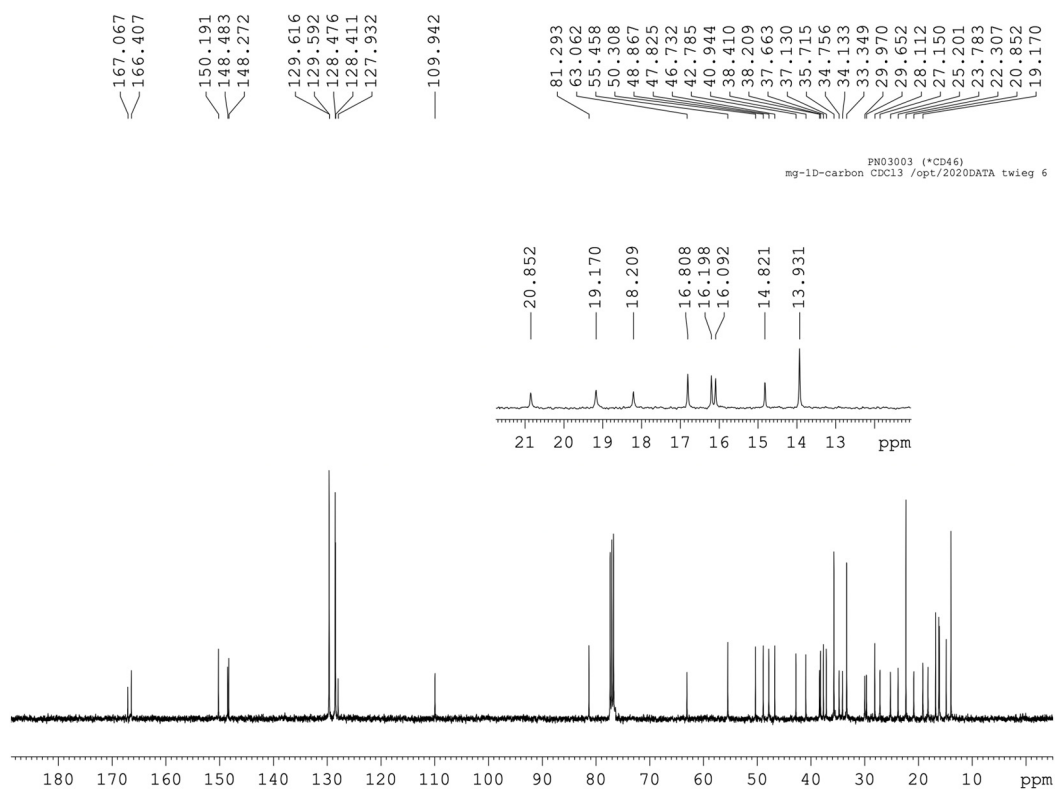

**$^{13}\text{C}$  NMR of Bio-CD46 (using fermentation derived betulin)**

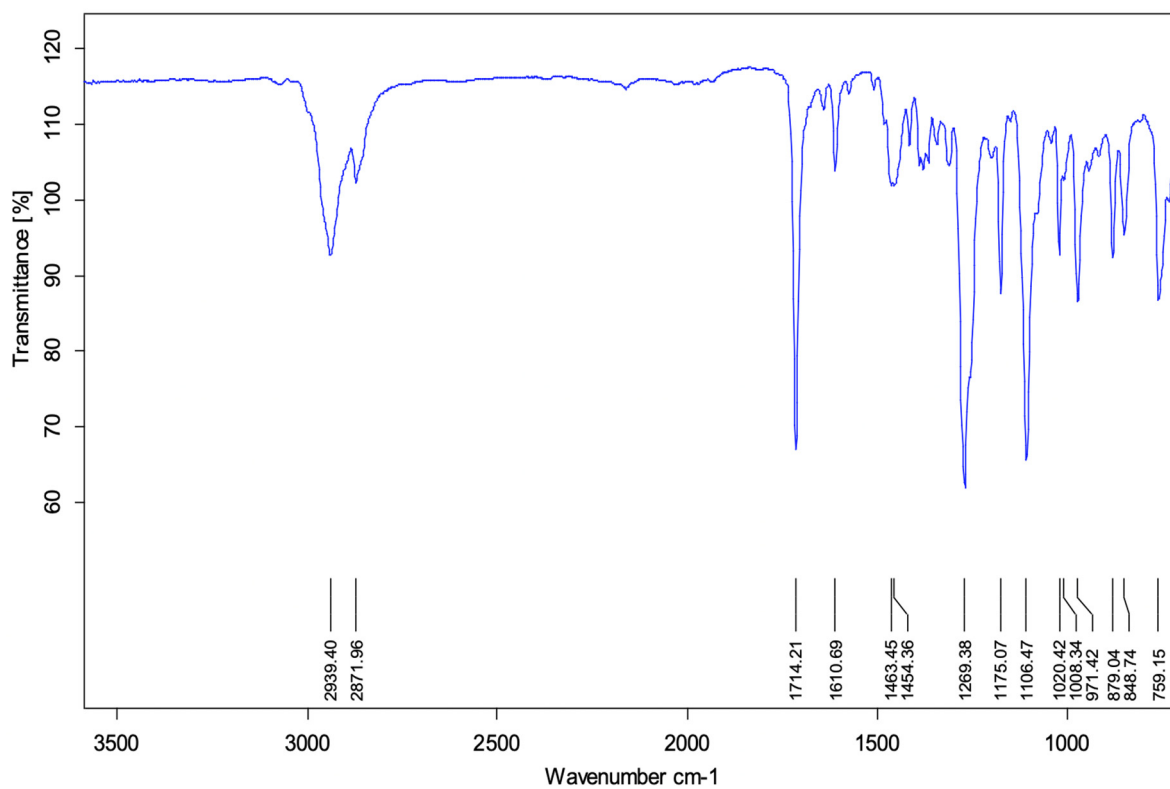

**IR Spectrum of Bio-CD46 (using fermentation derived betulin)**

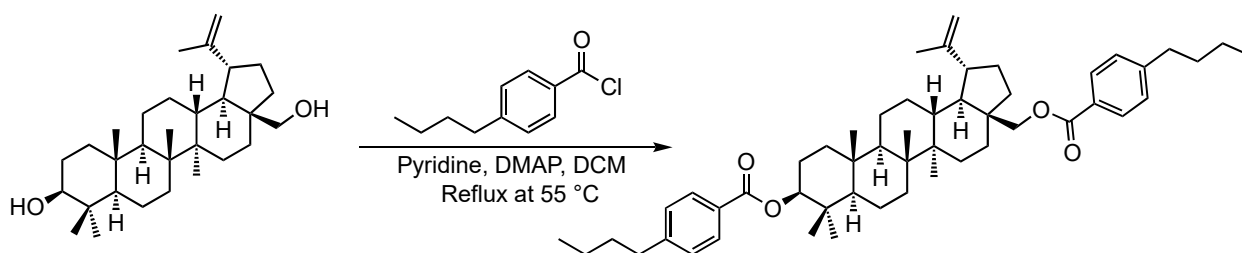

### Preparative Route for CD46 (using commercial betulin)

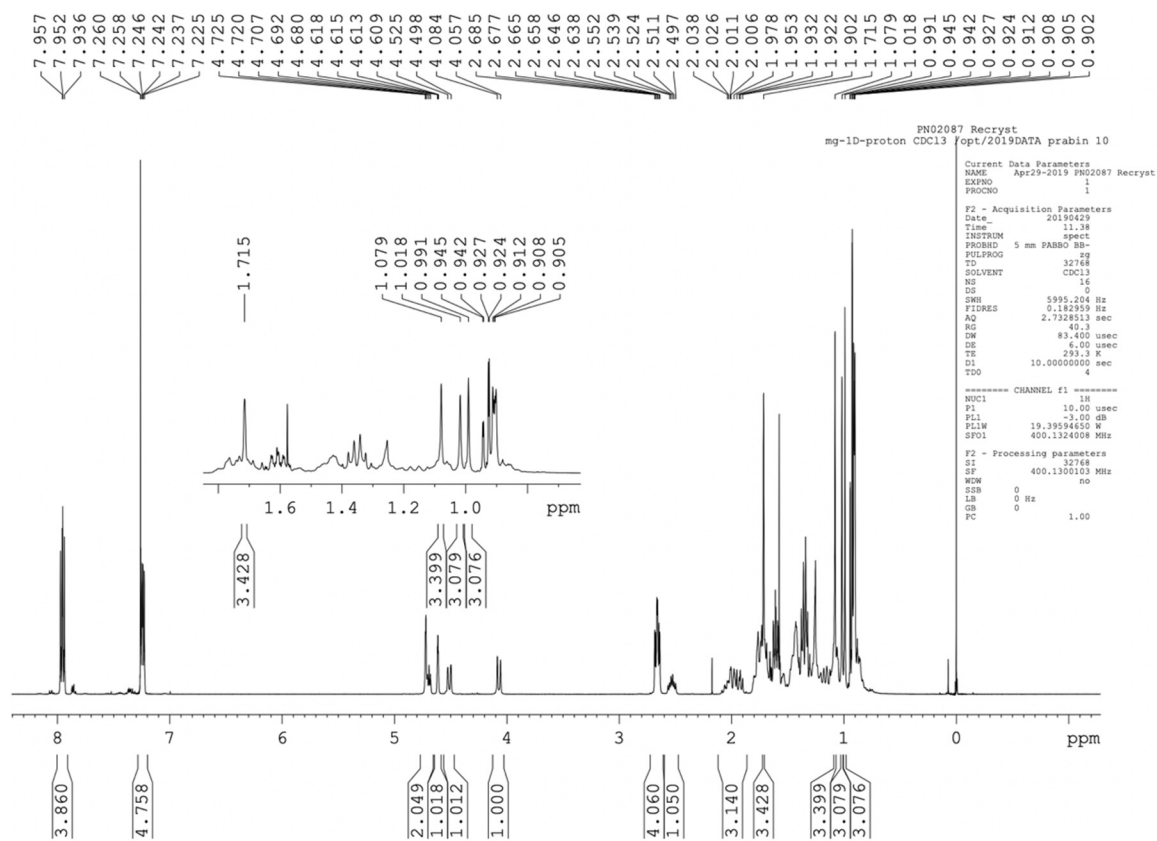

### <sup>1</sup>H NMR of CD46 (using commercial betulin)

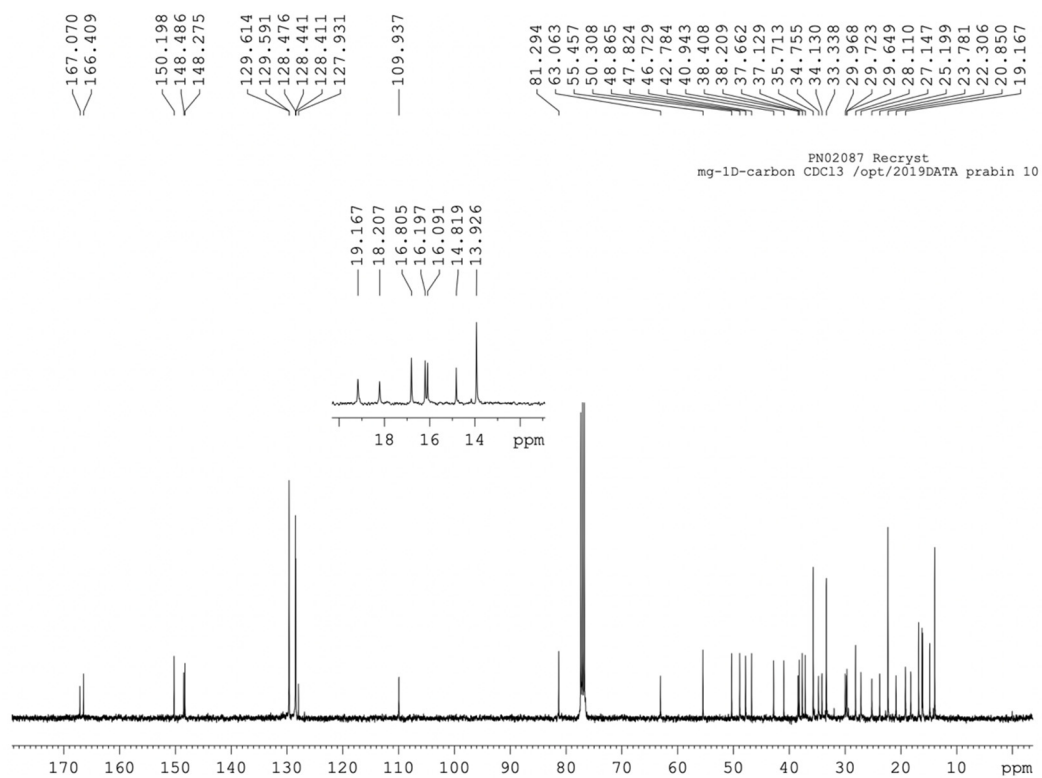

**<sup>13</sup>CNMR of CD46 (using commercial betulin) PN02087**

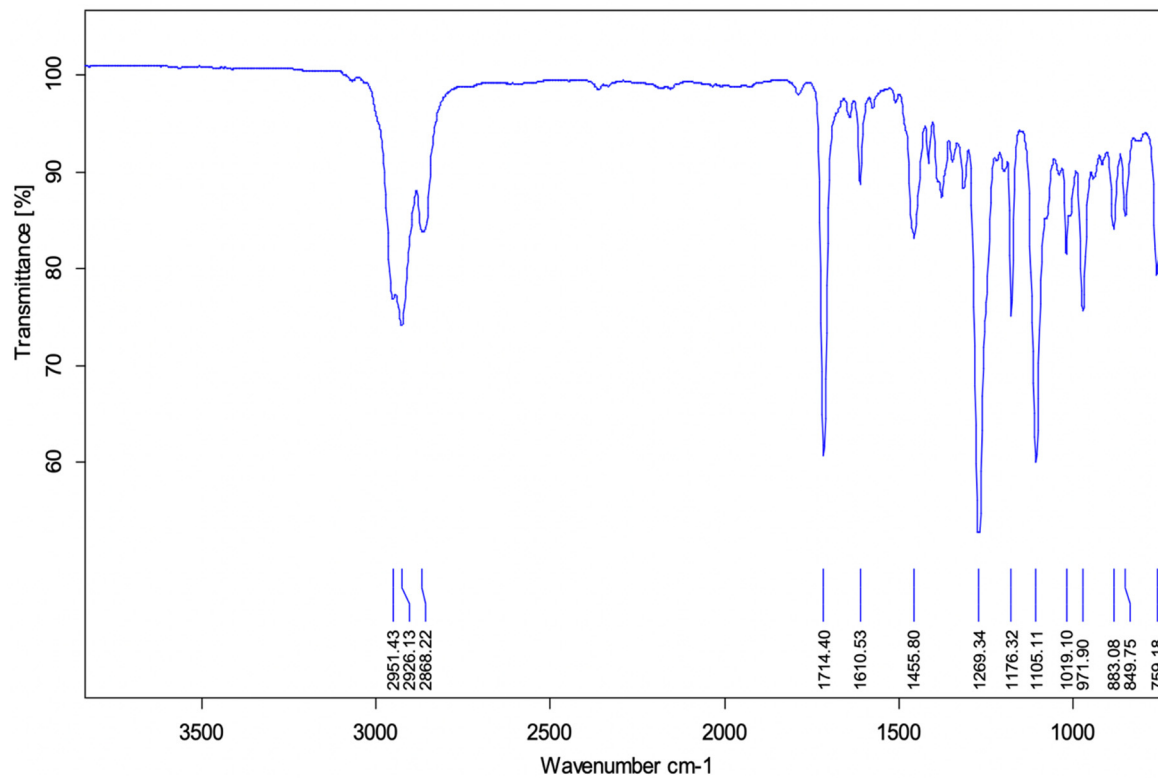

**IR Spectra of CD46 (using commercial betulin) PN02087**

## Spectral comparisons of bio-betulin and commercial betulin derived CD-46:

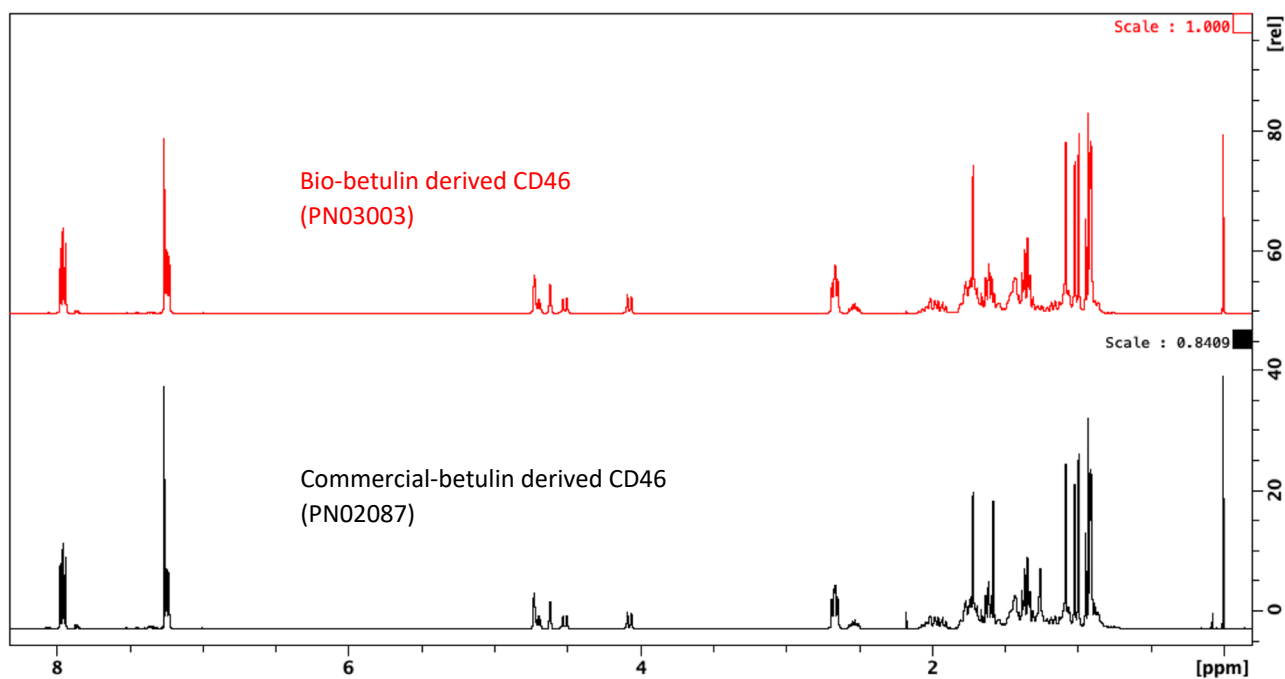

$^1\text{H}$ NMR comparison of CD-46 obtained from fermentation derived and commercial betulin.

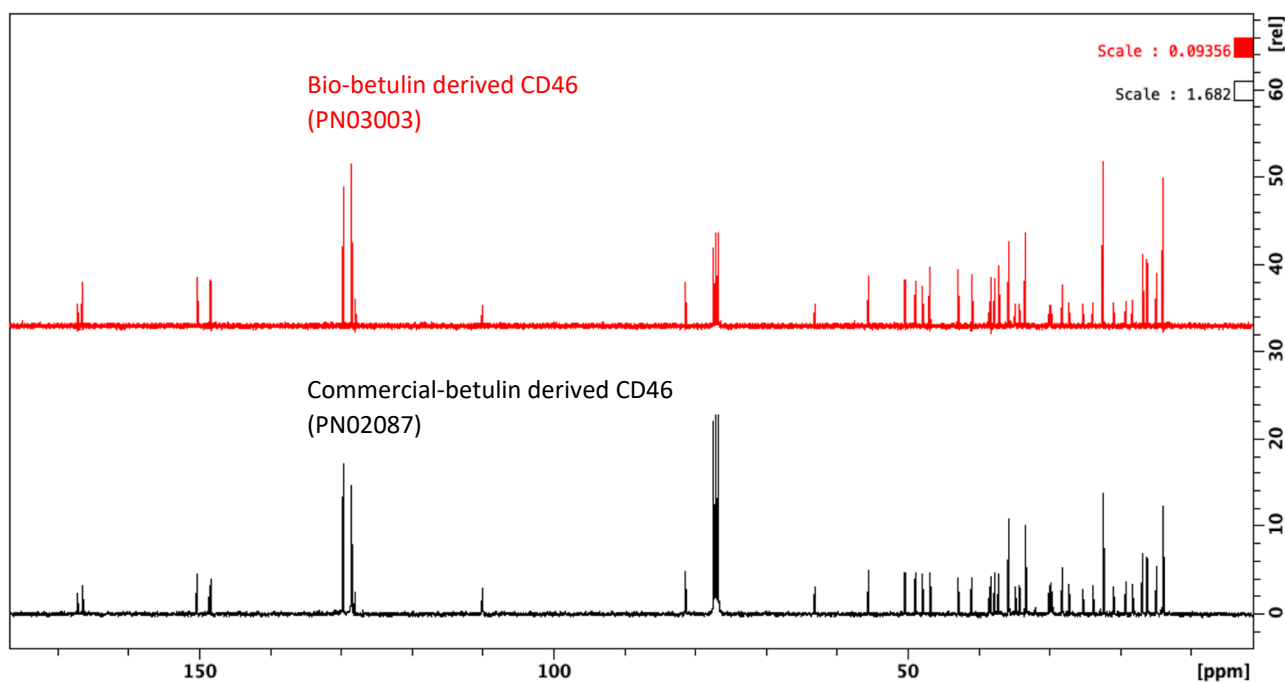

$^{13}\text{C}$ NMR comparison of CD-46 obtained from fermentation derived and commercial betulin.

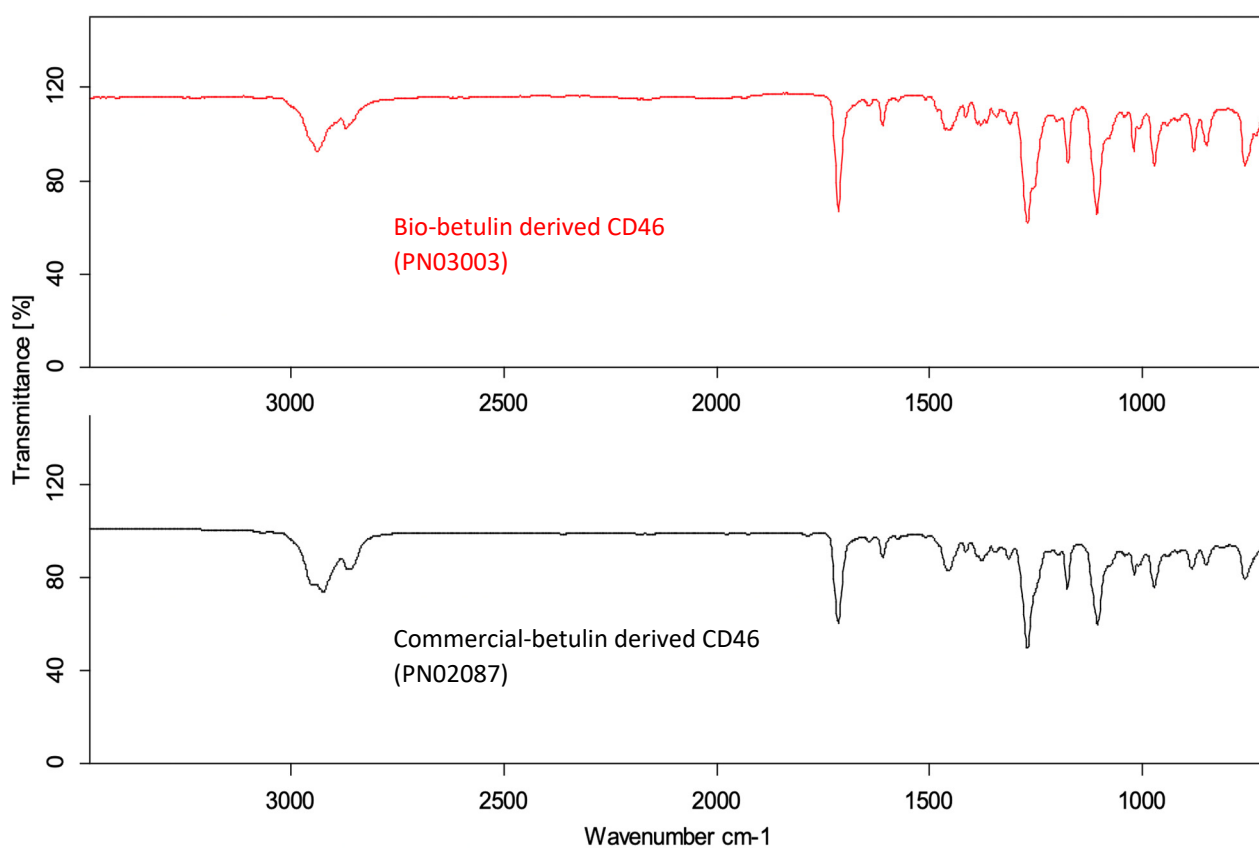

IR comparison of CD-46 obtained from fermentation derived and commercial betulin.

**Comment:**

The <sup>1</sup>H NMRs of **CD46** prepared from commercial betulin and fermentation derived betulin are identical. Likewise, the respective <sup>13</sup>C NMRs and infrared spectra are identical.

This is all evidence that the **CD46** prepared from the two betulin sources are identical.

### **HPLC Analysis Protocol:**

Betulin or its diester derivative (~6.000 mg) was weighed out and dissolved in 1,4-dioxane solvent (2.0 ml) to make ~3 mg/ml solution. This solution was vortexed and then sonicated for 10 minutes. A cholesterol solution in 1,4-dioxane (~2 mg/ml) as a standard solution was also prepared in the same manner. The betulin and cholesterol solutions prepared in this fashion (0.1 ml each) were transferred into a 2 ml vial and diluted to 1.0 ml by adding acetonitrile-water (90:10 v/v) solvent. This mixture was injected to the HPLC and the column was eluted with acetonitrile/water mixture. The chromatographic separation was achieved using a Restek Ultra BiPh 3  $\mu$ m 150 x 3.0 mm. The flow rate was maintained 0.5 ml/min and the detection wavelength was set to 210 nm.

### **Sample Info: Dioxane (Blank test).**

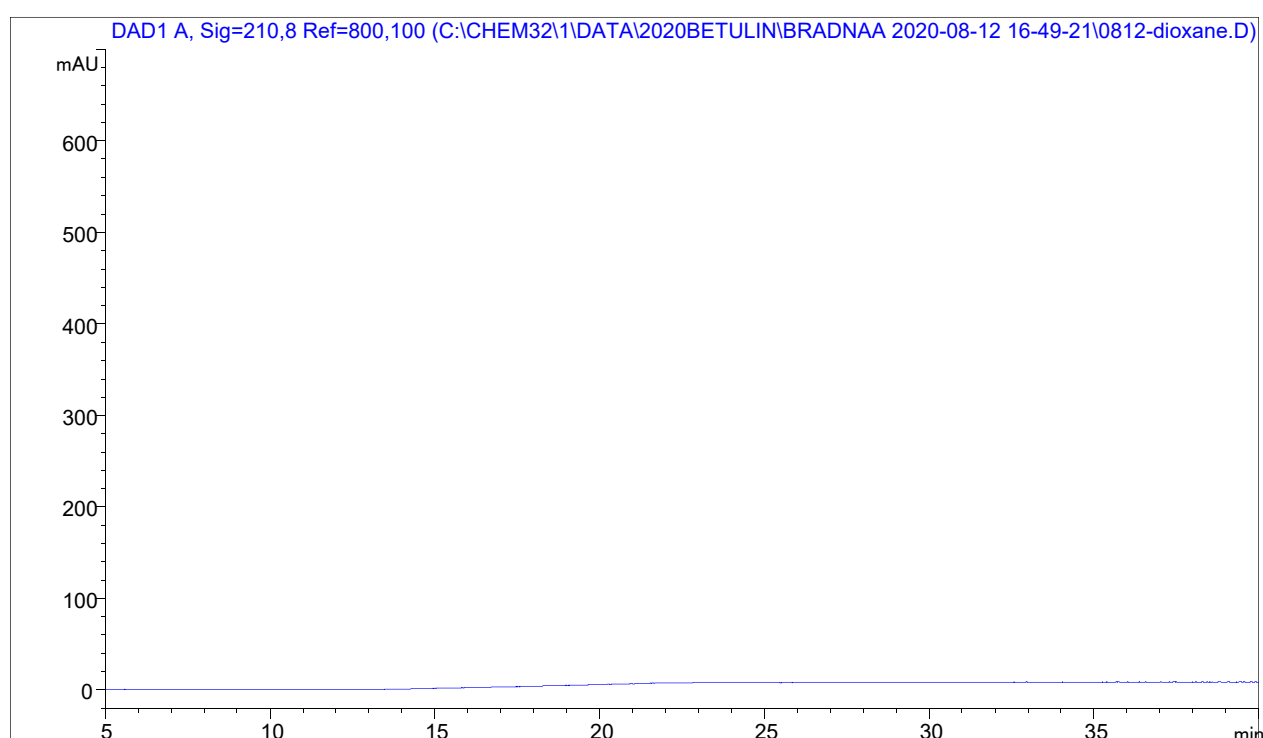

### **Comment:**

The HPLC of a dioxane only sample was performed here as a blank test to observe any signal that may appear due to contaminants in the dioxane solvent used for preparation of the betulin or betulin derivative samples. In the range from 5 minutes to 40 minutes no peaks due to any contaminant (that absorbs at 210 nm) were observed.

**Sample Info: Cholesterol, 0.207 mg/ml (Blank test).**

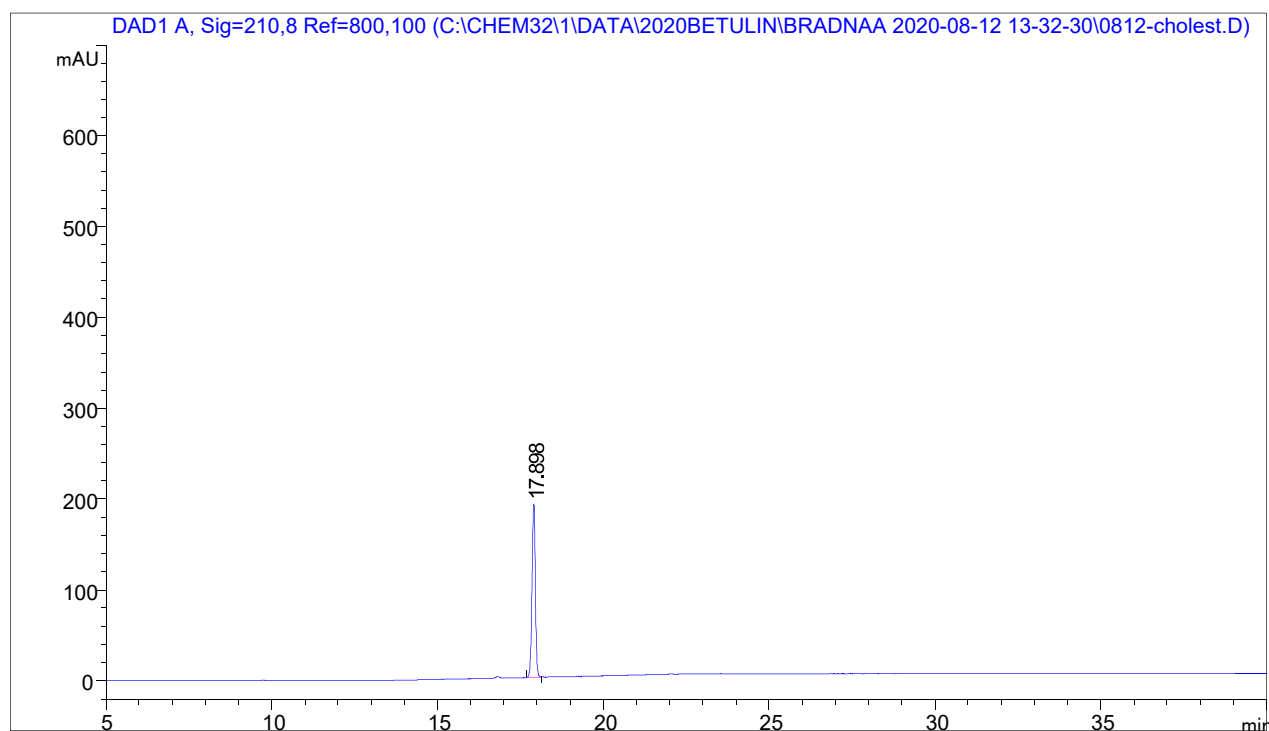

Signal 1: DAD1 A, Sig=210,8 Ref=800,100

| Peak # | RetTime [min] | Type | Width [min] | Area [mAU*s] | Height [mAU] | Area %  |
|--------|---------------|------|-------------|--------------|--------------|---------|
| 1      | 17.898        | BB   | 0.1072      | 1324.38367   | 190.31343    | 24.8020 |

**Comment:**

The HPLC of a cholesterol only sample was performed to determine the cholesterol peak position in the HPLC. Cholesterol is a steroid and an aliphatic polycyclic substance similar to betulin. Cholesterol (Sigma Grade, ≥99% C8667) was used as an internal standard for every HPLC run and its concentration was kept constant (0.207 mg/ml) in all experiments. From the HPLC it was observed that the cholesterol peak appeared at ~17.9 minutes. A single peak in the HPLC indicated this commercial standard as a pure compound.

In the HPLC runs the cholesterol standard (and other peaks) may not appear consistently at the exact same time as there may be some small discontinuity between sample injection and initiation of the HPLC run.

**Sample Info: Commercial Betulin (sample = 0.312 mg/ml, cholesterol = 0.207 mg/ml).**

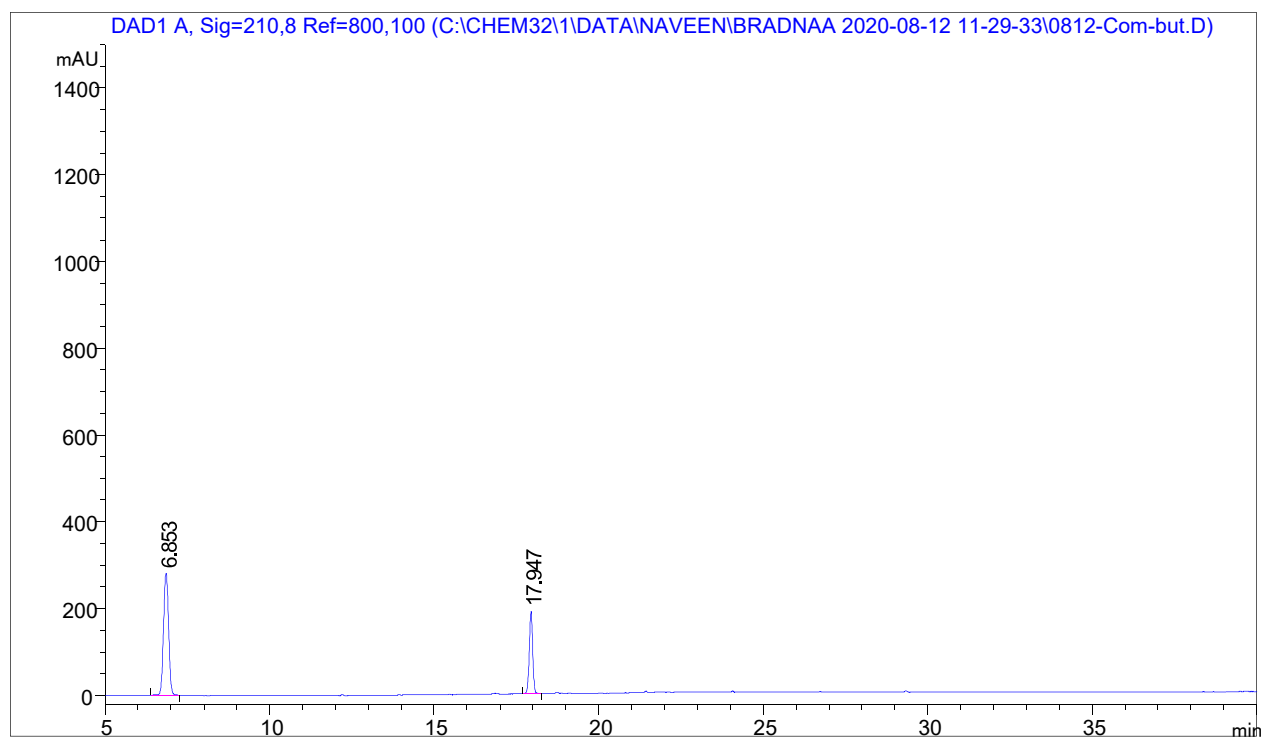

Signal 1: DAD1 A, Sig=210,8 Ref=800,100

| Peak # | RetTime [min] | Type | Width [min] | Area [mAU*s] | Height [mAU] | Area %  |
|--------|---------------|------|-------------|--------------|--------------|---------|
| 1      | 6.853         | BB   | 0.1693      | 3016.38110   | 280.94537    | 25.6396 |
| 2      | 17.947        | BB   | 0.1128      | 1376.94995   | 189.53867    | 11.7042 |

**Comment:**

This HPLC of commercial betulin (Ark Pharm Inc., USA) was run to learn the purity and peak position of this compound. This HPLC was also acquired to compare the HPLC spectrum of the bio-betulin sample received from Zymergen. From the HPLC it was observed that the peak at ~6.85 minutes was due to the pure betulin compound. The cholesterol standard appears at ~17.95 (similar to the retention time in the cholesterol blank test).

**Sample Info: Bio-betulin as received from Zymergen (sample = 0.334 mg/ml, cholesterol = 0.207 mg/ml).**

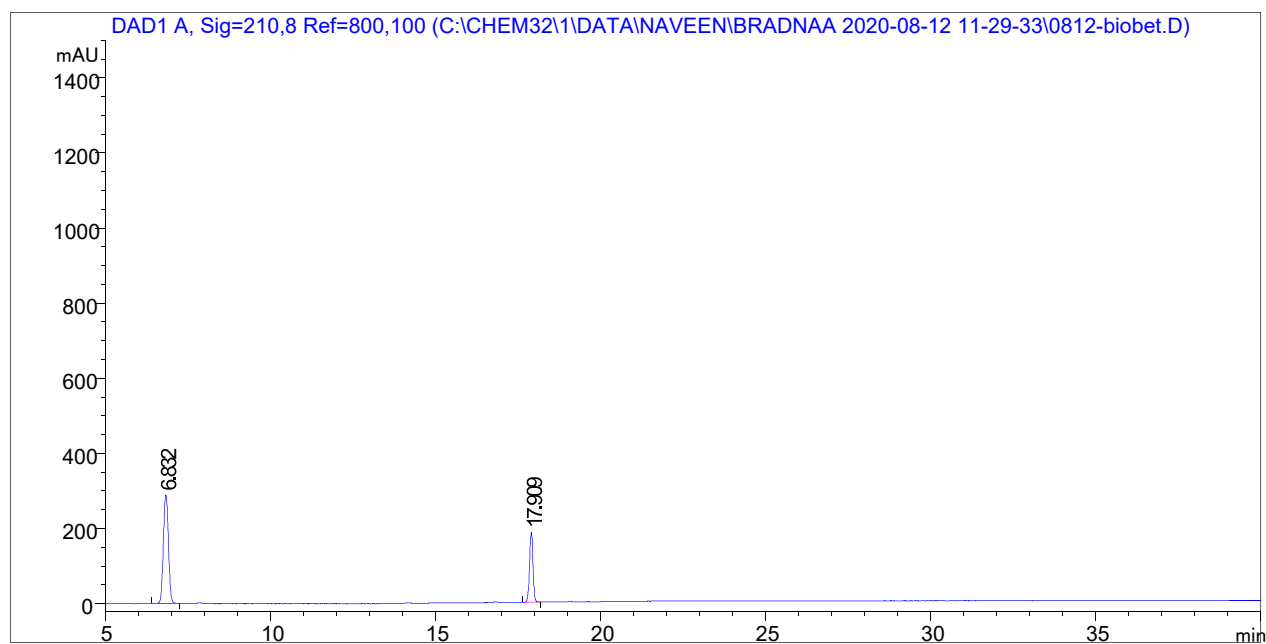

Signal 1: DAD1 A, Sig=210,8 Ref=800,100

| Peak # | RetTime [min] | Type | Width [min] | Area [mAU*s] | Height [mAU] | Area %  |
|--------|---------------|------|-------------|--------------|--------------|---------|
| 1      | 6.832         | BB   | 0.1679      | 3070.93701   | 289.11407    | 26.1176 |
| 2      | 17.909        | VB   | 0.1123      | 1350.91174   | 186.99074    | 11.4892 |

**Comment:**

This HPLC of bio-betulin (Zymergen, Emeryville, CA) was performed to analyze the compound's purity and to compare it with commercial bio-betulin. The HPLC retention time found for the bio-betulin (~6.83 min) is the same as was found with that of commercial betulin (~6.85 minute). The cholesterol standard appears at ~17.91 minute. Note that there are no additional detectable peaks in the HPLC run and thus the bio-betulin is found to contain no contaminants (that absorb at 210 nm).

**Sample Info:** CD46 derived from commercial betulin (sample = 0.306 mg/ml, cholesterol = 0.207 mg/m).

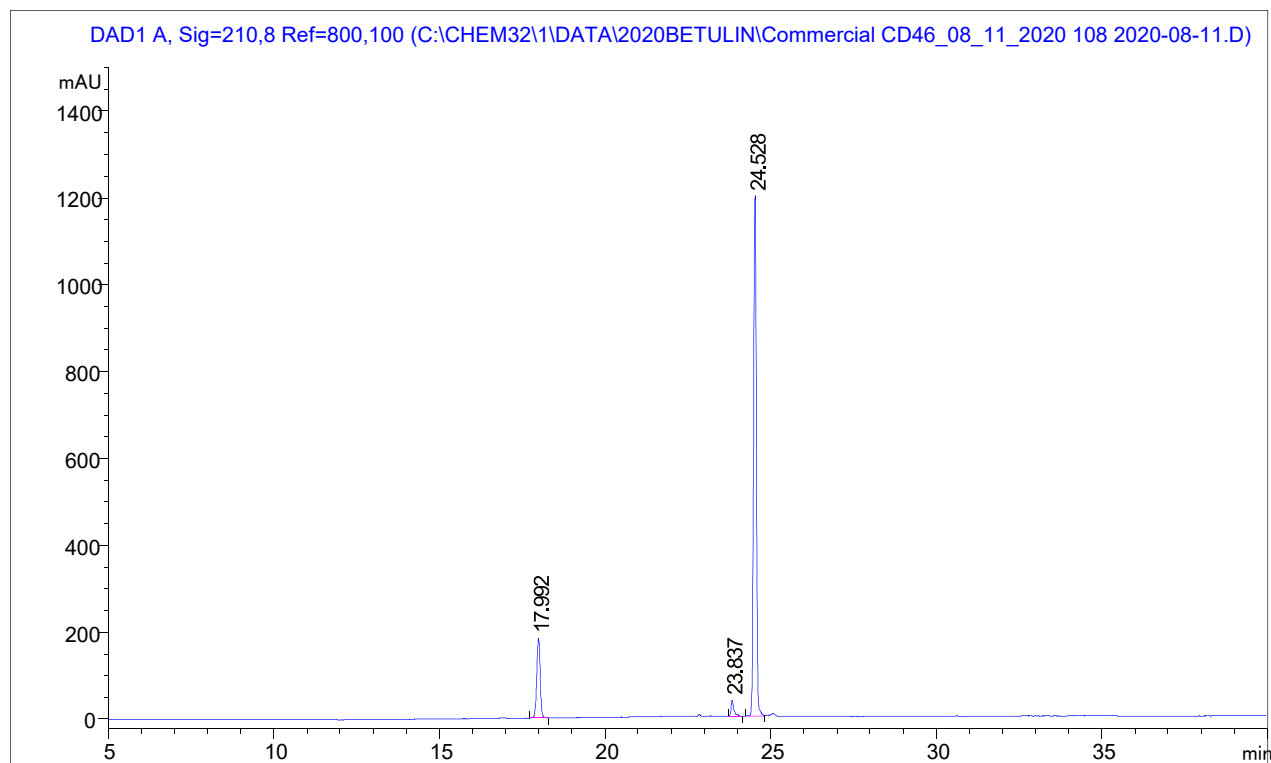

Signal 1: DAD1 A, Sig=210,8 Ref=800,100

| Peak # | RetTime [min] | Type | Width [min] | Area [mAU*s] | Height [mAU] | Area %  |
|--------|---------------|------|-------------|--------------|--------------|---------|
| 1      | 17.992        | BB   | 0.1106      | 1303.26868   | 184.18884    | 8.8089  |
| 2      | 23.837        | BB   | 0.0882      | 226.40718    | 37.63148     | 1.5303  |
| 3      | 24.528        | VV   | 0.0919      | 6981.00195   | 1198.66296   | 47.1853 |

**Comment:**

The HPLC of **CD46** (bis-*p*-butylbenzoylbetulin diester) obtained from commercial betulin was run to analyze the purity of the compound. It was observed that the **CD46** peak appeared at 24.53 minutes. The cholesterol standard appears at ~17.99 minutes.

A small peak at 23.84 minutes due to some unidentified impurity was also observed.

**Sample Info: Bio-CD46 derived from bio-betulin (sample = 0.318 mg/ml, cholesterol = 0.207 mg/ml).**

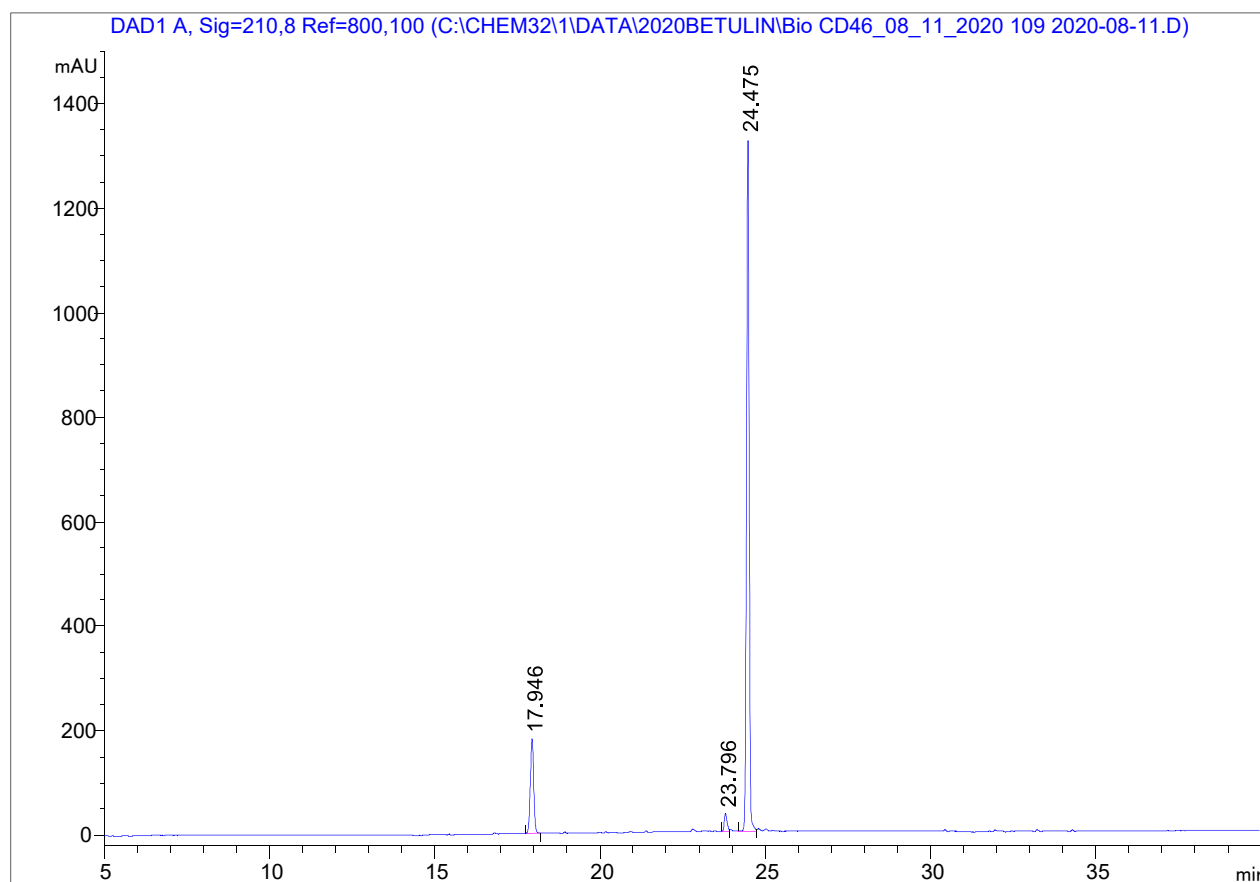

Signal 1: DAD1 A, Sig=210,8 Ref=800,100

| Peak # | RetTime [min] | Type | Width [min] | Area [mAU*s] | Height [mAU] | Area %  |
|--------|---------------|------|-------------|--------------|--------------|---------|
| 1      | 17.946        | BB   | 0.1105      | 1281.51440   | 181.26723    | 8.2514  |
| 2      | 23.796        | BV   | 0.0886      | 207.57158    | 35.30722     | 1.3365  |
| 3      | 24.475        | VV   | 0.0863      | 7315.06299   | 1327.54871   | 47.1003 |

#### Comment:

The HPLC of **Bio-CD46** (bis-*p*-butylbenzoylbetulin diester) obtained from bio-betulin was run to analyze the purity of the compound. It was observed that the bio-CD46 peak appeared at 24.75 minutes. The cholesterol standard appears at ~17.95 minutes.

The HPLC traces of **Bio-CD46** prepared from commercial betulin and betulin supplied by Zymergen are the same (small time difference due to injection issues or temperature control).

A small peak at 23.80 minutes due to some unidentified impurity is also observed here. This same impurity peak was previously seen in the commercial **CD46** sample.

**Sample Info: CD29 derived from Commercial betulin (sample = 0.350 mg/ml, cholesterol = 0.207 mg/ml).**

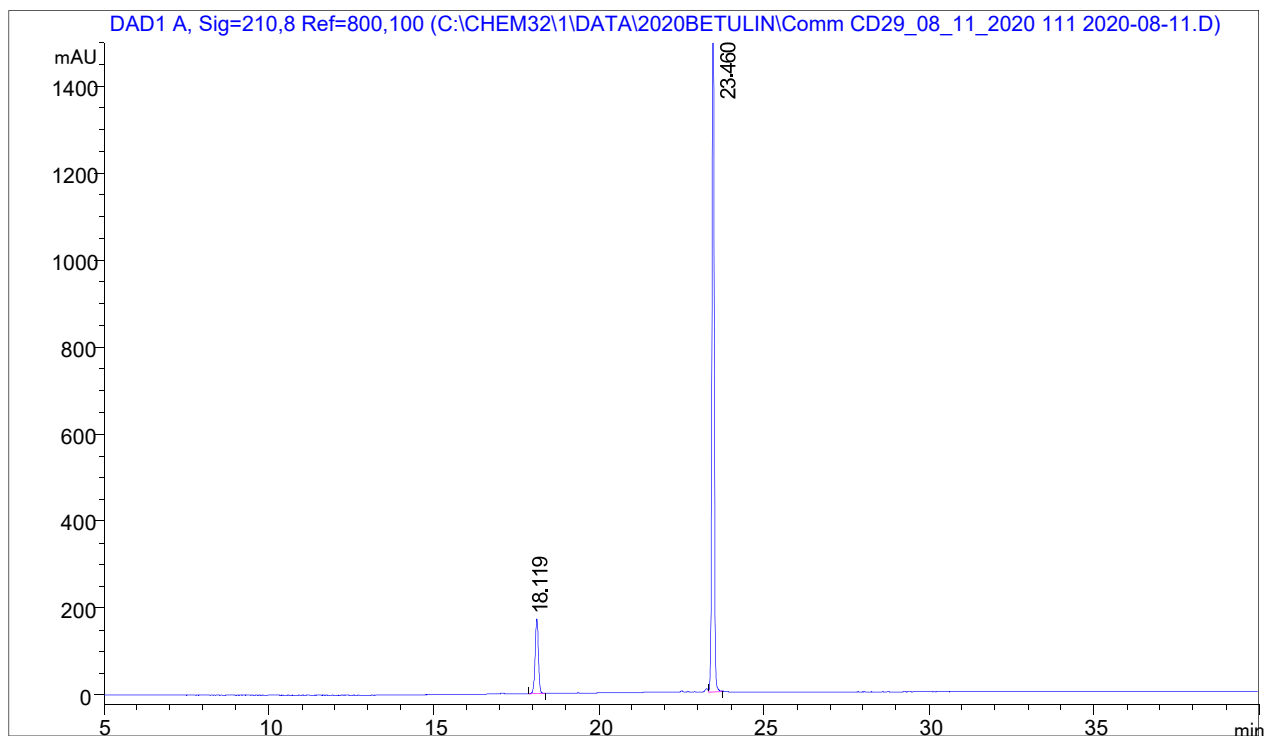

Signal 1: DAD1 A, Sig=210,8 Ref=800,100

| Peak # | RetTime [min] | Type | Width [min] | Area [mAU*s] | Height [mAU] | Area %  |
|--------|---------------|------|-------------|--------------|--------------|---------|
| 1      | 18.119        | BB   | 0.1063      | 1184.28467   | 172.04953    | 8.0741  |
| 2      | 23.460        | VB   | 0.0755      | 7123.36377   | 1498.60925   | 48.5651 |

**Comment:**

The HPLC of **CD29** (bis-*p*-toluylbetulin diester) obtained from commercial betulin was run to evaluate the purity of the compound. It was observed that the CD29 peak appeared at ~23.46 minutes. The cholesterol standard appears at ~18.1 minutes.

In this case no minor peaks were seen in the HPLC (only cholesterol and **CD29** were detected).

**Sample Info:** Bio-CD29 obtained from Bio-betulin (sample = 0.301 mg/ml, cholesterol = 0.207 mg/ml).

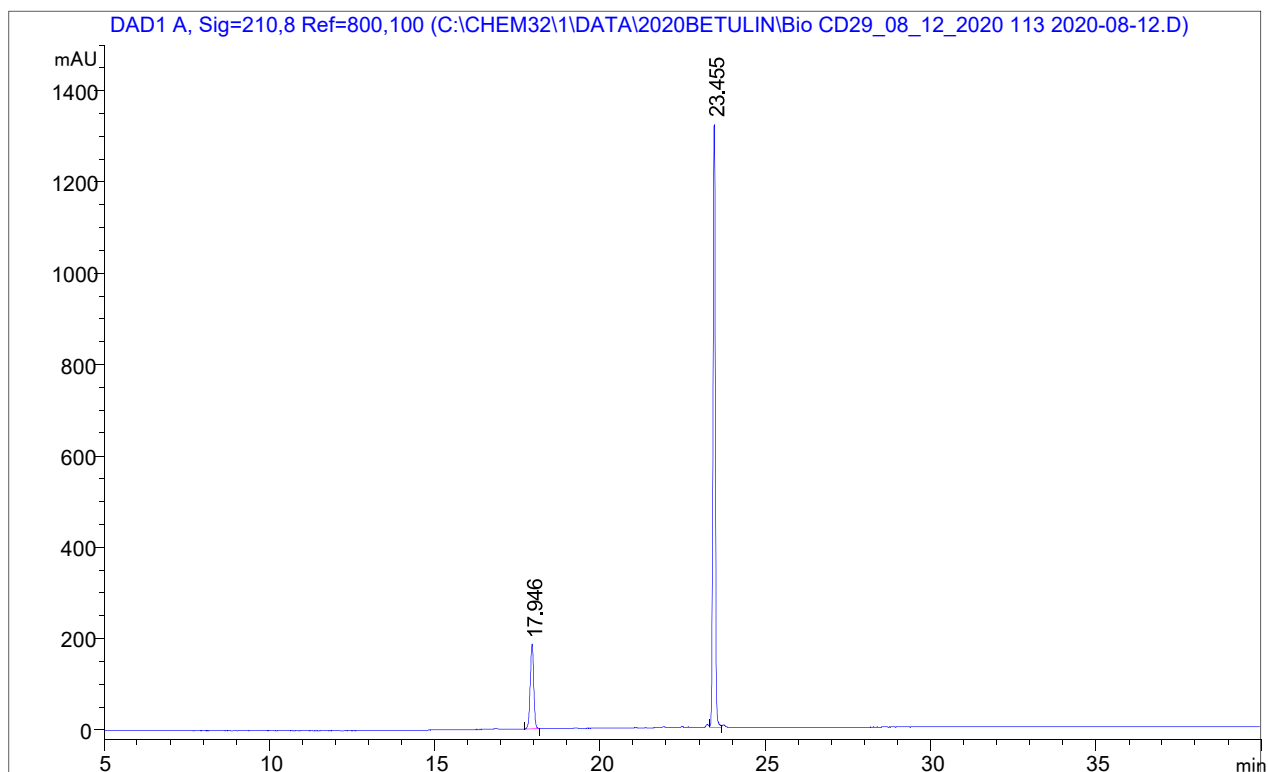

Signal 1: DAD1 A, Sig=210,8 Ref=800,100

| Peak # | RetTime [min] | Type | Width [min] | Area [mAU*s] | Height [mAU] | Area %  |
|--------|---------------|------|-------------|--------------|--------------|---------|
| 1      | 17.946        | BB   | 0.1130      | 1357.90381   | 186.38481    | 9.5740  |
| 2      | 23.455        | VV   | 0.0776      | 6540.34473   | 1324.98071   | 46.1133 |

**Comment:**

The HPLC of **Bio-CD29** (bis-*p*-butylbenzoyl betulin diester) obtained from bio-betulin was run to analyze the purity of the compound. It was observed that the bio-CD46 peak appeared at 24.75 minutes. The cholesterol standard appears at ~17.95 minutes.

The HPLC traces of **CD29** prepared from commercial betulin and the **Bio-CD29** made from bio-betulin supplied by Zymergen are the same (small time difference due to injection issues or temperature control).

In this case no minor peaks were seen in the HPLC (only cholesterol and **Bio-CD29** were detected).

**Sample Info: Commercial Betulin, Bio-betulin & cholesterol. (Betulin = (0.156 + 0.167) mg/ml, Cholesterol = 0.207 mg/ml). Co-injection.**

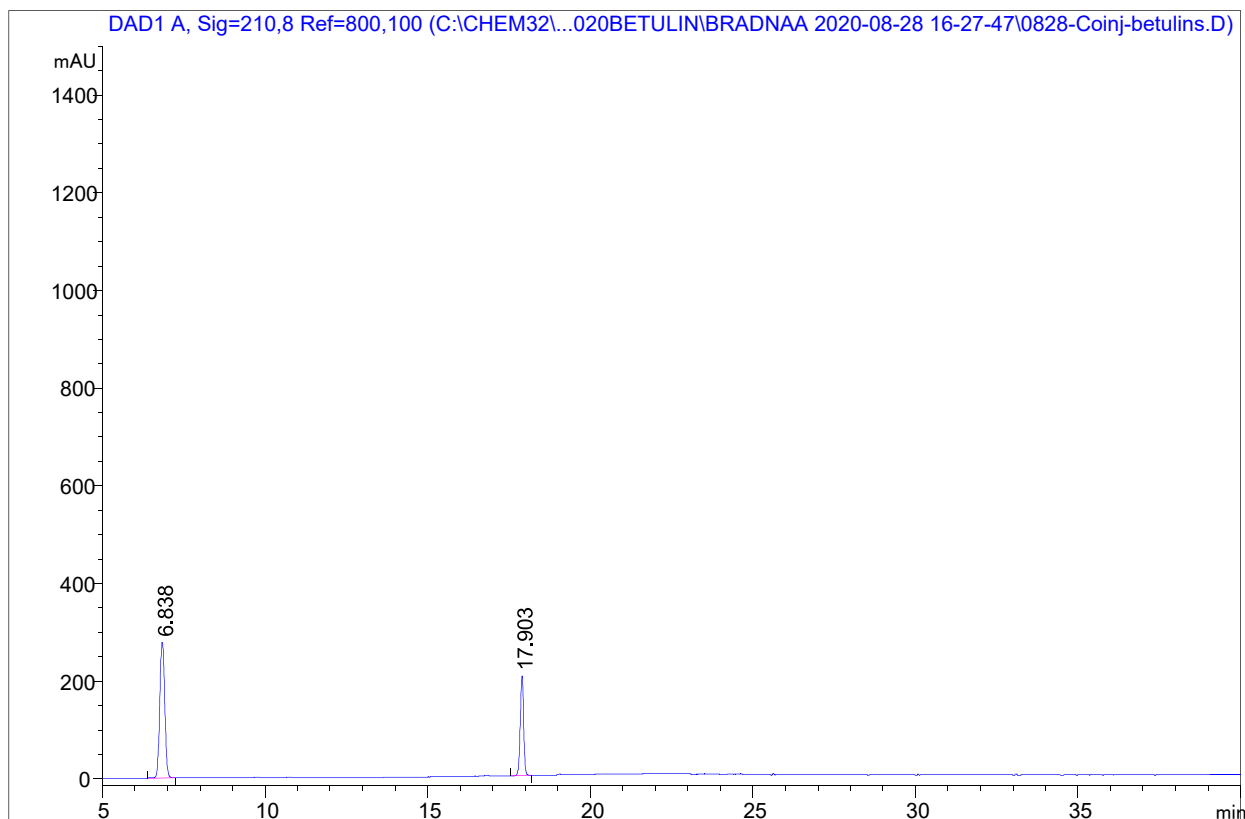

Signal 1: DAD1 A, Sig=210,8 Ref=800,100

| Peak # | RetTime [min] | Type | Width [min] | Area [mAU*s] | Height [mAU] | Area %  |
|--------|---------------|------|-------------|--------------|--------------|---------|
| 1      | 6.838         | BB   | 0.1705      | 2969.91821   | 278.28247    | 24.6395 |
| 2      | 17.903        | BB   | 0.1122      | 1471.87048   | 203.86864    | 12.2111 |

**Comment:**

The HPLC co-injection of a commercial betulin and bio-betulin mixture was performed to compare the compound obtained commercially and from bio source (Zymergen). This co-injection analysis is performed to back up the analysis of the individual materials seen earlier. The co-injection HPLC trace obtained here has a single peak at ~6.84 minutes retention time indicating commercial and bio-betulin were identical. The cholesterol standard appears at ~17.90 minutes.

**Sample Info: Commercial betulin derived CD29, bio-betulin derived CD29 & Cholesterol (CD29 = (0.175 + 0.150) mg/ml, Cholesterol = 0.207 mg/ml). Co-injection.**

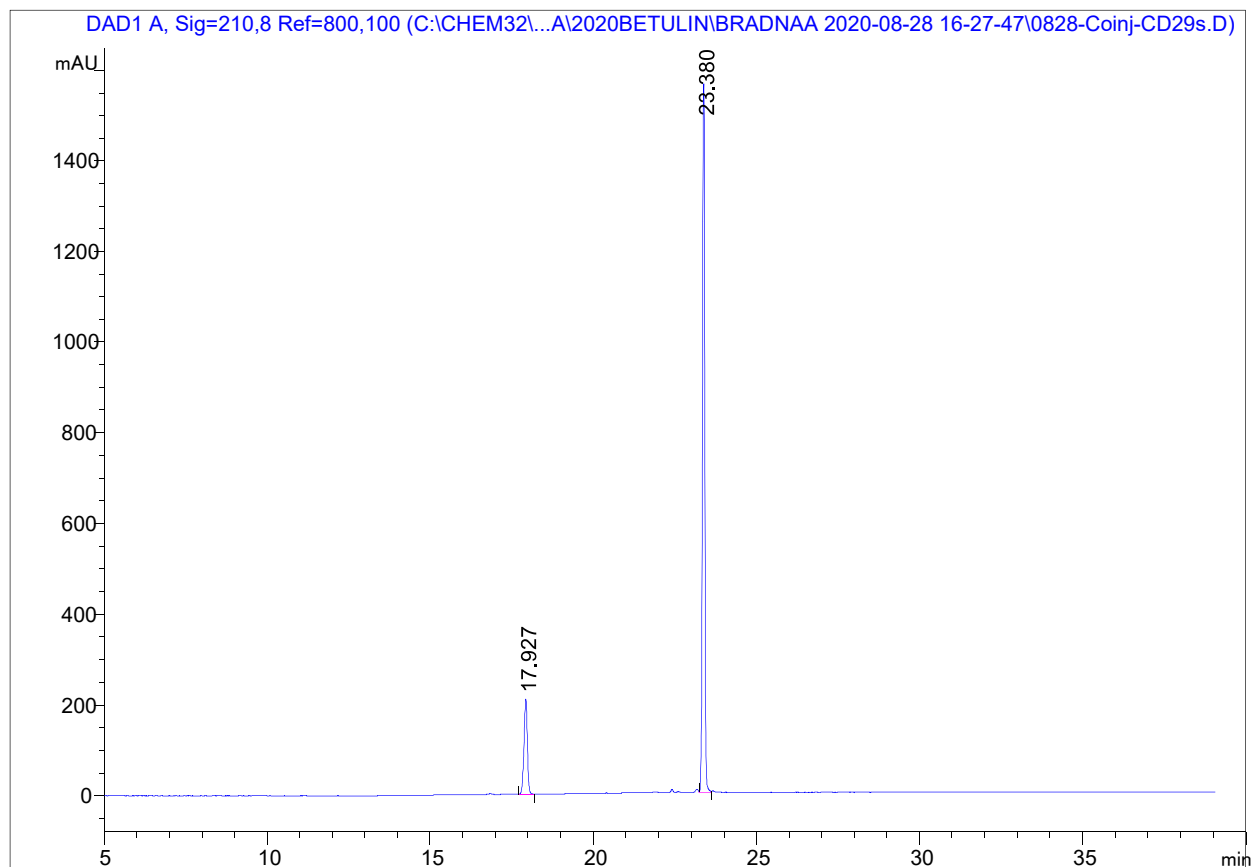

Signal 1: DAD1 A, Sig=210,8 Ref=800,100

| Peak # | RetTime [min] | Type | Width [min] | Area [mAU*s] | Height [mAU] | Area %  |
|--------|---------------|------|-------------|--------------|--------------|---------|
| 1      | 17.927        | BB   | 0.1120      | 1518.04675   | 210.71484    | 9.0503  |
| 2      | 23.380        | VV   | 0.0764      | 7575.38477   | 1567.08862   | 45.1627 |

**Comment:**

The HPLC co-injection of commercial betulin derived **CD29** and bio-betulin derived **Bio-CD29** was performed to confirm the compound derived from the commercial source and the compound obtained from the bio source are identical. This co-injection analysis is performed to back up the analysis of the individual materials. The HPLC showed a single peak at 23.38 minutes retention time confirming the two ester derivatives are identical. The cholesterol standard appears at ~17.9 minutes.

**Sample Info: Commercial betulin derived CD46, bio-betulin derived CD46 and cholesterol (CD46 = 0.153 + 0.159) mg/ml, Cholesterol = 0.207 mg/ml). Co-injection.**

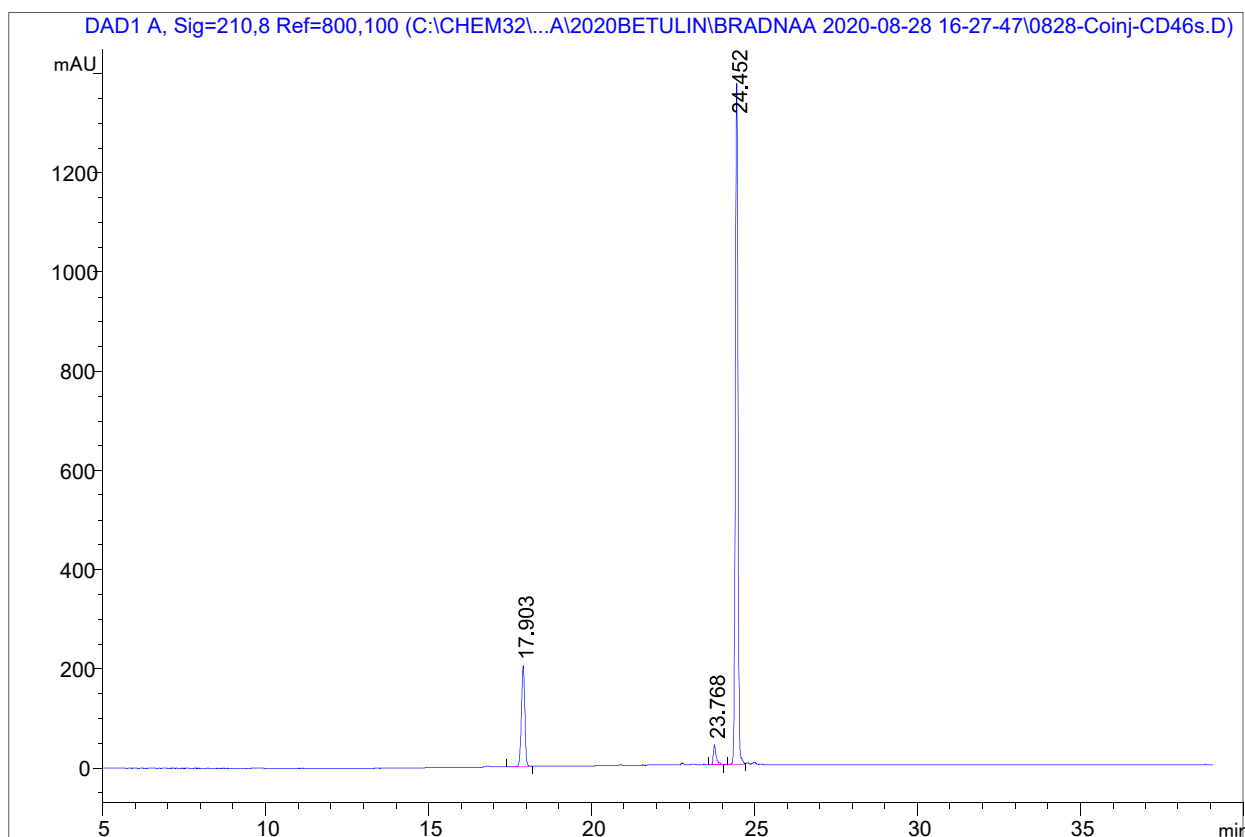

Signal 1: DAD1 A, Sig=210,8 Ref=800,100

| Peak # | RetTime [min] | Type | Width [min] | Area [mAU*s] | Height [mAU] | Area %  |
|--------|---------------|------|-------------|--------------|--------------|---------|
| 1      | 17.903        | VB   | 0.1123      | 1471.73401   | 203.57829    | 8.6928  |
| 2      | 23.768        | VV   | 0.0909      | 255.27625    | 40.82912     | 1.5078  |
| 3      | 24.452        | VV   | 0.0860      | 7541.87695   | 1374.66516   | 44.5462 |

#### Comment:

The analysis involves an HPLC co-injection of commercial betulin derived **CD46** and bio-betulin derived **bio-CD46**. This co-injection analysis is performed to back up the analysis of the individual materials. The HPLC shows a sharp peak at ~24.45 minutes retention time confirming both CD46 derivatives were same. The cholesterol standard appears at ~17.9 minutes. The minor peak at ~23.77 is due to some impurity. Notably, the impurity produced from CD46 derived from commercial betulin is the same as the impurity derived from the bio-betulin.

The minor product in the **CD46** preps was further investigated by intentional synthesis with samples removed at intervals, isolation of chromatography fractions and HPLC experiments. Experiments run thus far indicate that the minor product is not a monoester of betulin and is also not 4-*n*-butylbenzoic acid. The impurity likely arises from contamination of the 4-*n*-butylbenzoyl chloride (not the betulins).

**Melting point table for CD29 and CD46 derived from fermentation derived and commercial betulin**

| # | Ref. Code                 | Melting Point |
|---|---------------------------|---------------|
| 1 | PN03011 (Bio-CD29)        | 207-209 °C    |
| 2 | PN02075 (Commercial-CD29) | 207-209 °C    |
| 3 | PN03003 (Bio-CD46)        | 160-162 °C    |
| 4 | PN02087 (Commercial-CD46) | 159-161 °C    |

**Comment:**

Melting points were determined by microscopy.

The similar melting points for the **bio-CD29** derived from fermentation derived betulin and **CD29** derived from commercial betulin indicate the compounds are identical (and thus the commercial betulin and fermentation derived betulin precursors are identical).

Likewise, the similar melting points for **bio-CD46** derived from fermentation derived betulin and **CD46** derived from commercial betulin indicate the compounds are identical (and thus the commercial betulin and fermentation derived betulin precursors are identical).
